# Supplementary material
Source: Research Square preprint supplement (doi:10.21203/rs.3.rs-8898876/v1)
Supplement: Supplementary file 1 [file 12c515877bb40222b969bbe3.docx]

# Supplementary File 1: Semi-Structured Interview Guide

**Manuscript Title:** Psychological Trauma Among Families of the 2025 Post-Election Protest Victims in Tanzania: A Qualitative Thematic Analysis

**Author:** Emanuel Ismael Maphie

**Purpose of the Interview Guide**

This semi-structured interview guide was developed specifically for this study to explore the psychological experiences, coping mechanisms, and social support systems of families who lost relatives during the 2025 post-election protests in Tanzania. The questions are designed to allow participants to describe their experiences in their own words while enabling the researcher to probe deeper into issues related to grief, trauma, resilience, and support mechanisms.

**Interview Instructions**

The interviewer should begin by explaining the purpose of the study, ensuring confidentiality, and confirming that the participant has provided informed consent. Participants should be reminded that they may decline to answer any question or withdraw from the interview at any time. The interviewer should conversationally ask questions and may use probing questions as needed to obtain deeper insights.

## Section A: Background Information

1. Can you briefly tell me about yourself and your relationship to the family member who died during the protests?

2. How long had you lived with or been closely connected to the deceased?

3. What role did the deceased person play in your family before their death?

## Section B: Experiences Surrounding the Loss

4. Can you describe what happened when your family member died during the protest events?

5. How did you first learn about the incident?

6. What were your immediate reactions when you received the news?

## Section C: Psychological and Emotional Experiences

7. How did the loss affect you emotionally and psychologically?

8. What kinds of thoughts or feelings have you experienced since the incident?

9. Have you experienced any changes in sleep, appetite, mood, or daily functioning since the loss?

10. How has the loss affected other members of your family?

## Section D: Social and Community Responses

11. How did your community respond after the death of your family member?

12. Did you receive any support from friends, neighbours, or community leaders?

13. What kind of support was most helpful during this difficult time?

## Section E: Coping Mechanisms

14. What has helped you cope with the loss of your family member?

15. Are there any cultural, religious, or personal practices that have helped you deal with the grief?

16. What challenges have you faced in trying to cope with this loss?

## Section F: Institutional Support and Needs

17. Have you received any support from government institutions, NGOs, or other organisations?

18. If yes, what type of support did you receive?

19. What kind of support do you think families like yours need most after such incidents?

## Section G: Closing Questions

20. Looking back, how has this experience changed your life or your family?

21. What message would you like to share with policymakers or society regarding families affected by protest-related violence?

22. Is there anything else you would like to share that we have not discussed?

**End of Interview Guide**
